# Supplementary material for: KIR/KIR-ligand genotypes and clinical outcomes following chemoimmunotherapy in patients with relapsed or refractory neuroblastoma: a report from the Children’s Oncology Group
Source: PubMed Central journal article supplement — J Immunother Cancer. 2023 Feb 23;11(2):e006530. doi: 10.1136/jitc-2022-006530 (PMC9950969; doi:10.1136/jitc-2022-006530), 2023-02-23
Supplement: jitc-2022-006530supp001.pdf [file jitc-2022-006530supp001.pdf]

**Supplemental Table 1. Characteristics of Eligible Subjects with DNA Available for Testing.**

| Characteristic                                                        | I/T/TEMS  |      | I/T/DIN/GM-CSF |      | Overall   |      |
|-----------------------------------------------------------------------|-----------|------|----------------|------|-----------|------|
|                                                                       | N         | %    | N              | %    | N         | %    |
|                                                                       | 14        | 23.7 | 45             | 76.3 | 59        | 100  |
| <b>Age at Diagnosis (Years)</b>                                       |           |      |                |      |           |      |
| Median                                                                | 5.4       |      | 3.9            |      | 4.3       |      |
| Range                                                                 | 2.2, 15.9 |      | 0.2, 13.3      |      | 0.2, 15.9 |      |
| IQR                                                                   | 4.0, 7.8  |      | 2.8, 6.9       |      | 2.9, 7.1  |      |
| <b>Age at Enrollment (Years)</b>                                      |           |      |                |      |           |      |
| Median                                                                | 7.3       |      | 5.7            |      | 6.2       |      |
| Range                                                                 | 3.3, 16.2 |      | 1.3, 15.9      |      | 1.3, 16.2 |      |
| IQR                                                                   | 5.5, 9.4  |      | 4.1, 7.8       |      | 4.3, 8.1  |      |
| <b>Time from Diagnosis of High-Risk Disease to Enrolment (Months)</b> |           |      |                |      |           |      |
| Median                                                                | 10.1      |      | 7.7            |      | 8         |      |
| Range                                                                 | 3.4, 60.4 |      | 3.0, 53.7      |      | 3.0, 60.4 |      |
| IQR                                                                   | 7.0, 32.1 |      | 5.2, 24.1      |      | 5.3, 25.6 |      |
| <b>INSS/INRG Stage at Diagnosis of High-Risk Disease</b>              |           |      |                |      |           |      |
| Stage 4/M                                                             | 13        | 92.9 | 40             | 88.9 | 53        | 89.8 |
| Not Stage 4/M                                                         | 1         | 7.1  | 5              | 11.1 | 6         | 10.2 |
| <b>MYCN Status at Diagnosis</b>                                       |           |      |                |      |           |      |
| Amplified                                                             | 3         | 23.1 | 10             | 23.3 | 13        | 23.2 |
| Non-amplified                                                         | 10        | 76.9 | 33             | 76.7 | 43        | 76.8 |
| Unknown                                                               | 1         | --   | 2              | --   | 3         | --   |
| <b>Disease Status at Enrollment</b>                                   |           |      |                |      |           |      |
| Relapsed                                                              | 8         | 57.1 | 20             | 44.4 | 28        | 47.5 |
| Refractory/PD                                                         | 6         | 42.9 | 25             | 55.6 | 31        | 52.5 |
| <b>Site of Disease at Enrollment</b>                                  |           |      |                |      |           |      |
| Bone                                                                  | 8         | 57.1 | 29             | 64.4 | 37        | 62.7 |
| Bone Marrow                                                           | 4         | 28.6 | 28             | 62.2 | 32        | 54.2 |
| Liver                                                                 | 0         | 0    | 5              | 11.1 | 5         | 8.5  |
| Lung                                                                  | 1         | 7.1  | 1              | 2.2  | 2         | 3.4  |
| Other Soft Tissue                                                     | 10        | 71.4 | 35             | 77.8 | 45        | 76.3 |
| <b>Measurable Disease</b>                                             |           |      |                |      |           |      |
| Yes                                                                   | 9         | 64.3 | 32             | 71.1 | 41        | 69.5 |
| Primary Site                                                          | 1         | 7.1  | 19             | 42.2 | 20        | 33.9 |
| Metastatic Soft Tissue Site(s)                                        | 8         | 57.1 | 19             | 42.2 | 27        | 45.8 |
| No                                                                    | 5         | 35.7 | 13             | 28.9 | 18        | 30.5 |
